# Supplementary material for: Characterization of Innate Responses Induced by PLGA Encapsulated- and Soluble TLR Ligands In Vitro and In Vivo in Chickens
Source: PLoS One. 2017 Jan 3;12(1):e0169154. doi: 10.1371/journal.pone.0169154 (PMC5207720; doi:10.1371/journal.pone.0169154)
Supplement: S3 Table — (XLSX) [file pone.0169154.s003.xlsx]

## Sheet: S3_Table.xlsx
Dose adminstered	Live weight measurment: day 7 old layer conventional chickens intramuscularly injected with PLGA NPs
	Individual chickens	Live weight (gram)
No PLGA NPs (0 mg/bird)		Day 7	Day 14
	1	76.8	126.7					Day 7	Day 14
	2	77.22	132.25				0 mg	74.36	127.76
	3	69.06	124.33				2.5mg	73.306	126.506
	Mean	74.36	127.76				5 mg	73.004	123.056
	SD	4.59474	4.06501				10 mg	74.076	125.466
2.5 mg PLGA NPs/bird	1	75.56	128.24
	2	68.25	110.85
	3	75.72	133.39
	4	72.35	131.02
	5	74.65	129.03
	Mean	73.306	126.506
	SD	3.13015	8.97571
5 mg PLGA NPs/bird	1	74.45	126.55
	2	75.18	123.21
	3	68.25	117.59
	4	73.01	124.04
	5	74.13	123.89
	Mean	73.004	123.056
	SD	2.77012	3.30805
10 mg PLGA NPs/bird	1	68.25	107.36
	2	77.5	132.94
	3	76.42	132.12
	4	72.95	128.63
	5	75.26	126.28
	Mean	74.076	125.466
	SD	3.66845	10.4718
